# Supplementary material
Source: PubMed Central journal article supplement (PMC2077269)

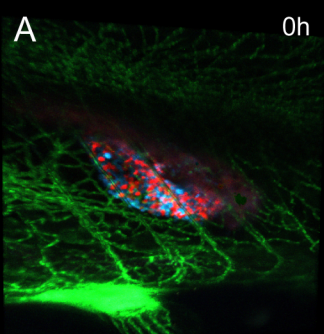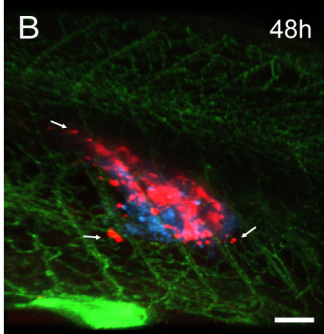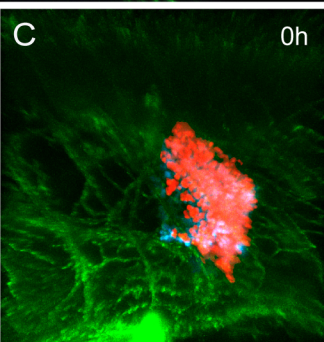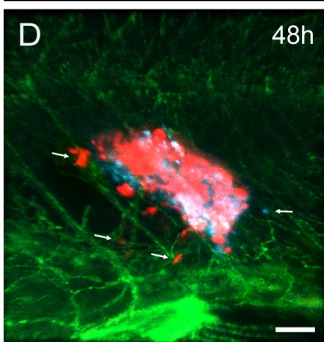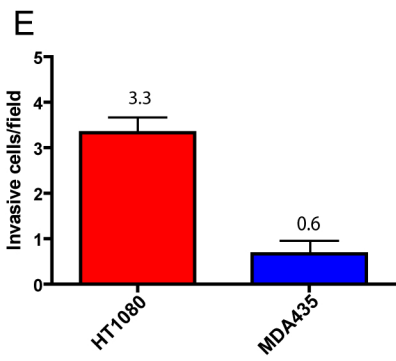

Supplement: pnas_0703446104_1.pdf [file pnas_0703446104_1.pdf]
